# Supplementary material for: Investigation of Orthopedic Prosthesis Socket Management after Transfemoral Amputation by Expert Survey
Source: MDPI journal article supplement (doi:10.3390/prosthesis3020015), 2021-05-12
Supplement: s1 [file s1]

## Zustandserhebung nach transfemorale Amputation

Name: \_\_\_\_\_

Vorname: \_\_\_\_\_ Techniker: \_\_\_\_\_

Geburtsdatum: \_\_\_\_\_ Datum: \_\_\_\_\_

Amputation: links ☐ / rechts ☐ Datum der Amputation: \_\_\_\_\_

Amputationsgrund: \_\_\_\_\_

Körpergewicht: \_\_\_\_\_ kg Körpergröße: \_\_\_\_\_ cm

### Allgemeiner Gesundheitszustand:

(Erkrankungen/ weitere Behinderungen)

Einschränkungen in der Hör-, Seh-, Sprechfähigkeit ja ☐ / nein ☐

Art: \_\_\_\_\_

Herz, Kreislauf, Stoffwechselerkrankung: ja ☐ / nein ☐

Art: \_\_\_\_\_

Medikamenteneinnahme: ja ☐ / nein ☐

Art: \_\_\_\_\_

### Funktions- und Bewegungseinschränkungen der kontralateralen Seite:

Fuß: ja ☐ / nein ☐

Art: \_\_\_\_\_

OSG: ja ☐ / nein ☐

Art: \_\_\_\_\_

Kniegelenk: ja ☐ / nein ☐

Art: \_\_\_\_\_

Seitenbänder stabil: ja ☐ / nein ☐

Kreuzbänder stabil: ja ☐ / nein ☐

Hüftgelenk: ja ☐ / nein ☐

Art: \_\_\_\_\_

Sonstiges: pAVK ja ☐ / nein ☐

Varikosis: ja ☐ / nein ☐

Oedemneigung: ja ☐ / nein ☐

Funktionseinschränkung des Rumpfes: ja ☐ / nein ☐

Art: \_\_\_\_\_

Funktionseinschränkungen der oberen Extremitäten: ja ☐ / nein ☐

Art: \_\_\_\_\_

Klinische Untersuchung des Stumpfes:

Stumpflänge: Kurz (<1/3) ☐ Mittel (>1/3/ <2/3) ☐ Lang (>2/3) ☐

Bewegungsausschlag: (nach SFTR- Notierung):

Abduktion - 0 - Adduktion: \_\_\_\_\_ / \_\_\_\_\_ / \_\_\_\_\_

Extension - 0 - Flexion: \_\_\_\_\_ / \_\_\_\_\_ / \_\_\_\_\_

Kraftentfaltung:

Abduktion

| 0                        | 1                        | 2                        | 3                        | 4                        | 5                        |
|--------------------------|--------------------------|--------------------------|--------------------------|--------------------------|--------------------------|
| <input type="checkbox"/> |
| <input type="checkbox"/> |
| <input type="checkbox"/> |
| <input type="checkbox"/> |

Adduktion

Extension

Flexion

Sensibilität: gesteigert (+) unauffällig (0) geschwächt (-)

Wärmeempfinden ( ) Areal \_\_\_\_\_

Kälteempfinden ( ) Areal \_\_\_\_\_

Berührungsempfindlichkeit ( ) Areal \_\_\_\_\_

Schmerzempfinden ( ) Areal \_\_\_\_\_

Stumpfendbelastbarkeit: Kontaktfähig ☐ Belastungsfähig ☐ Tragfähig ☐

gering ☐

mittel ☐

hoch ☐

Hautzustand:

normal ☐

trocken ☐

schuppig ☐

nässend ☐

Unterhautgewebe:

straff ☐

normal ☐

weich ☐

|                                       |                                                                                    |
|---------------------------------------|------------------------------------------------------------------------------------|
| Narbeneinziehungen/<br>-verwachsungen | ja <input type="checkbox"/> / nein <input type="checkbox"/><br>Lokalisation: _____ |
| Verfärbungen:                         | ja <input type="checkbox"/> / nein <input type="checkbox"/><br>Lokalisation: _____ |
| Entzündungen:                         | ja <input type="checkbox"/> / nein <input type="checkbox"/><br>Lokalisation: _____ |
| Randknoten:                           | ja <input type="checkbox"/> / nein <input type="checkbox"/><br>Lokalisation: _____ |
| Weichteilüberhänge:                   | ja <input type="checkbox"/> / nein <input type="checkbox"/><br>Lokalisation: _____ |
| weitere Stumpfprobleme:               | ja <input type="checkbox"/> / nein <input type="checkbox"/><br>Lokalisation: _____ |

Aktuell festgestellter Aktivitätsgrad:      0 ☐    1 ☐    2 ☐    3 ☐    4 ☐

**Stumpf - Protokoll der Umfangmaße**

| Datum:  |  |  |  |  |
|---------|--|--|--|--|
| 0 cm    |  |  |  |  |
| 2,5 cm  |  |  |  |  |
| 5 cm    |  |  |  |  |
| 7,5 cm  |  |  |  |  |
| 10 cm   |  |  |  |  |
| 12,5 cm |  |  |  |  |
| 15 cm   |  |  |  |  |
| 20 cm   |  |  |  |  |
| 25 cm   |  |  |  |  |
